# Supplementary material for: Facile synthesis of hollow carbon microspheres embedded with molybdenum carbide nanoparticles as an efficient electrocatalyst for hydrogen generation
Source: Royal Society of Chemistry journal article supplement (doi:10.1039/c6ra16490k), 2016-01-01
Supplement: c6ra16490k1.pdf [file c6ra16490k1.pdf]

## **Facile Synthesis of Hollow Carbon Microspheres Embedded with Molybdenum Carbide Nanoparticles as an Efficient Electrocatalyst for Hydrogen Generation**

Cuncai Lv,<sup>a,b</sup> Jie Wang,<sup>b</sup> Qingli Huang,<sup>c</sup> Qianpeng Yang,<sup>b</sup> Zhipeng Huang,<sup>\*b</sup> Chi Zhang<sup>\*b</sup>

<sup>a</sup> *School of Material Science and Engineering, Jiangsu University, Zhenjiang, 212013, China.*

<sup>b</sup> *Functional Molecular Materials Research Centre, Scientific Research Academy, and China-Australia Joint Research Center for Functional Materials, Jiangsu University, Zhenjiang, 212013, China.*

<sup>c</sup> *Testing Center, Yangzhou University, Yangzhou, 225009, China*

<sup>\*</sup>Corresponding author. Zhipeng Huang, Chi Zhang

E-mail: [zphuang@ujs.edu.cn](mailto:zphuang@ujs.edu.cn), [chizhang@ujs.edu.cn](mailto:chizhang@ujs.edu.cn)

### **Electronic Supplementary Information**

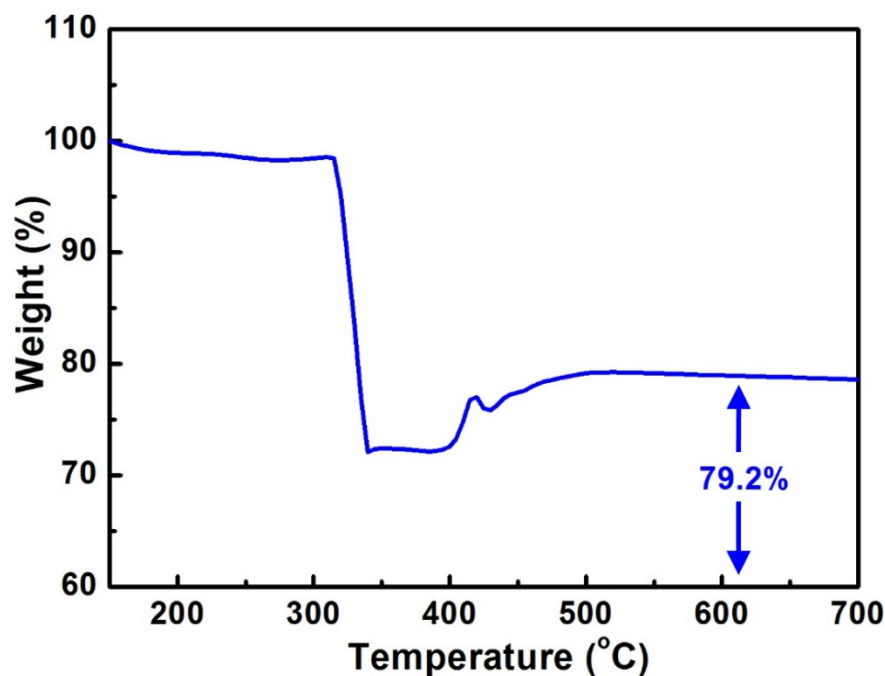

**Figure S1.** TGA curve of Mo<sub>2</sub>C/HCMs in O<sub>2</sub> atmosphere with heating rate of 10 °C min<sup>-1</sup>.

#### Computation 1.

At 700 °C, all Mo<sub>2</sub>C nanoparticles were oxidized to MoO<sub>3</sub> during the TGA measurement in oxygen atmosphere, and all carbon was removed. The weight percent of Mo<sub>2</sub>C in Mo<sub>2</sub>C/HCMs is computed according to the follow equation:

$$\frac{2 * w_{Mo_2C}}{M_{Mo_2C}} = \frac{w_{remain}}{M_{MoO_3}}$$

Where  $w_{Mo_2C}$  is the weight percent of Mo<sub>2</sub>C,  $M_{Mo_2C}$  is the molecular weight of Mo<sub>2</sub>C,  $w_{remain}$  is the weight of MoO<sub>3</sub> suggested by the TGA curve,  $M_{MoO_3}$  is the molecular weight of MoO<sub>3</sub>. According to the TGA curve,  $w_{remain}$  is 79.2%, and then  $w_{Mo_2C}$  is computed to be 56.1%.

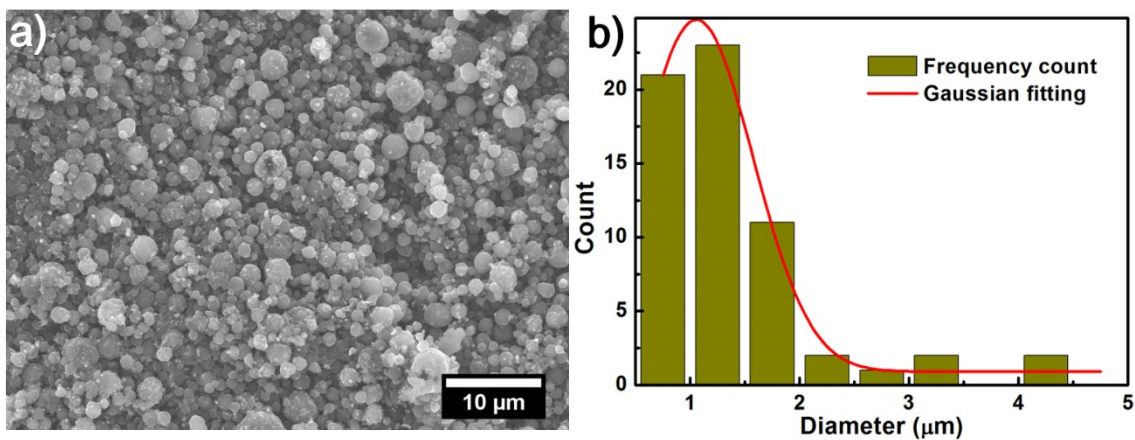

**Figure S2.** (a) A typical low magnification SEM image of the Mo<sub>2</sub>C/HCMs. (b) Diameter distribution of hollow carbon microspheres (HCMs) in the Mo<sub>2</sub>C/HCMs.

**Table S1.** Key performance of representative Mo<sub>2</sub>C nanostructures.

| Catalyst                                                                      | Substrate                    | Mass density<br>(mg cm <sup>-2</sup> ) | $\eta_{10}$<br>(mV)                | $\eta_{20}$<br>(mV) | Tafel slope<br>(mV/dec) | Electrolyte                                     |
|-------------------------------------------------------------------------------|------------------------------|----------------------------------------|------------------------------------|---------------------|-------------------------|-------------------------------------------------|
| Mo <sub>2</sub> C nanoparticles supported on Vulcan carbon black <sup>1</sup> | GCE                          | 0.6                                    | 180                                | 210                 | 82                      | 0.5 M H <sub>2</sub> SO <sub>4</sub>            |
| Commercial Mo <sub>2</sub> C particles <sup>2</sup>                           | carbon-paste electrodes      | 1.4                                    | 210                                | 225                 | 56                      | 0.5 M H <sub>2</sub> SO <sub>4</sub>            |
| Mo <sub>2</sub> C/CNT<br>Mo <sub>2</sub> C/XC-72R <sup>3</sup>                | carbon paper                 | 2                                      | 140( $\eta_8$ )<br>200( $\eta_8$ ) |                     | 55.2<br>59.4            | 0.1 M HClO <sub>4</sub>                         |
| Mo <sub>2</sub> C nanowires<br>Mo <sub>2</sub> C nanosheets <sup>4</sup>      | GCE                          | 0.357                                  | 200<br>225                         | 220<br>260          | 55.8<br>64.5            | 0.5 M H <sub>2</sub> SO <sub>4</sub>            |
| Mo <sub>1</sub> Soy-RGO <sup>5</sup>                                          | carbon paper                 | 0.47                                   | 177                                | --                  | 66.4                    | 0.1 M HClO <sub>4</sub>                         |
| 3D hierarchical porous Mo <sub>2</sub> C framework <sup>6</sup>               | GCE                          | 0.28                                   | 97                                 | 125                 | 60                      | 0.5 M H <sub>2</sub> SO <sub>4</sub>            |
| Mesoporous m Mo <sub>2</sub> C nano-octahedrons <sup>7</sup>                  | glassy carbon disk electrode | 0.8                                    | 142                                | 160                 | 53                      | 0.5 M H <sub>2</sub> SO <sub>4</sub>            |
| Mo <sub>2</sub> C-WC Composite Nanowires <sup>8</sup>                         | GCE                          | 1.28                                   | 130                                | 150                 | 52                      | 0.5 M H <sub>2</sub> SO <sub>4</sub>            |
| Mo <sub>2</sub> C/HCMs                                                        | GCE                          | 0.285                                  | 179<br>265                         | 203<br>346          | 83.9<br>143.4           | 0.5 M H <sub>2</sub> SO <sub>4</sub><br>1 M KOH |

### Electrochemical surface area.

Electrochemical capacitance was measured to evaluate the effective surface area of various catalysts.<sup>9, 10</sup> Cyclic voltammetry (CV) experiments were performed at various scan rates (60, 80, 100, 120, 140, 160 and 180  $\text{mV s}^{-1}$ ) in 0.1-0.2 V vs. RHE at pH 7. The cyclic voltammograms of the  $\text{Mo}_2\text{C}/\text{HCMs}$  are plotted in Figures S3a and that of the  $\text{Mo}_2\text{C}/\text{XC-72R}$  in Figure S3b. The capacitance current density ( $\Delta J = J_a - J_c$  at 0.15 V vs. RHE) was plotted against the scan rate and the specific capacitance is estimated by plotting the  $\Delta J$ , being 17.2  $\text{mF cm}^{-2}$  for the  $\text{Mo}_2\text{C}/\text{HCMs}$  and 1.4  $\text{mF cm}^{-2}$  for the  $\text{Mo}_2\text{C}/\text{XC-72R}$  (Figure 4b). As the specific capacitance is proportional to the surface area and the conductivity of the materials, a much larger specific capacitance of the  $\text{Mo}_2\text{C}/\text{HCMs}$  than that of the  $\text{Mo}_2\text{C}/\text{XC-72R}$ , indicates the high exposure of effective active sites for the  $\text{Mo}_2\text{C}/\text{HCMs}$ , which is responsible for the excellent HER activity.

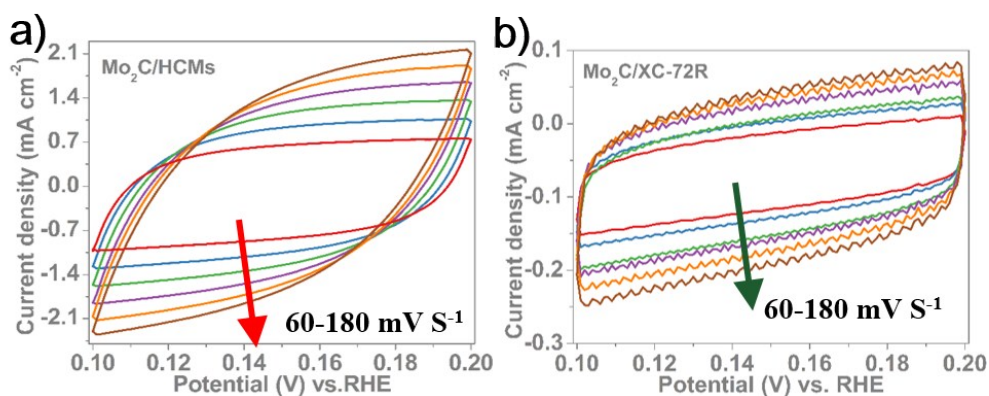

**Figure S3.** (a,b) Cyclic voltammetry curves of  $\text{Mo}_2\text{C}/\text{HCMs}$  and  $\text{Mo}_2\text{C}/\text{XC-72R}$  in the region of 0.1-0.2 V vs. RHE, respectively. (c) The differences in current density variation ( $\Delta J = J_a - J_c$ ) at an overpotential of 0.15 V plotted against scan rate fitted to a linear regression enables the estimation of the specific capacitance.

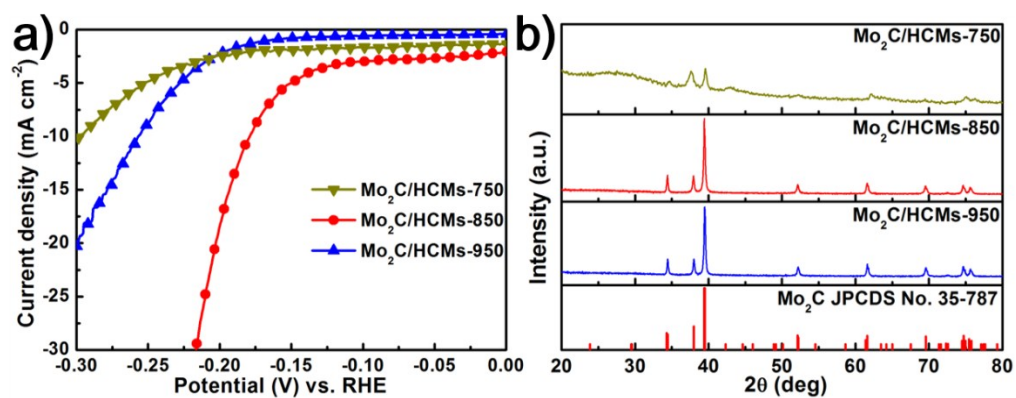

**Figure S4.** Polarization curves and corresponding XRD patterns of  $\text{Mo}_2\text{C}/\text{PCMs-750}$ ,  $\text{Mo}_2\text{C}/\text{PCMs-850}$  and  $\text{Mo}_2\text{C}/\text{PCMs-950}$ .

## Reference

1. S. Tuomi, R. Guil-Lopez and T. Kallio, *J. Catal.*, 2016, 334, 102-109.
2. H. Vrubel and X. Hu, *Angew. Chem. Int. Ed.*, 2012, 51, 12703-12706.
3. W. F. Chen, C. H. Wang, K. Sasaki, N. Marinkovic, W. Xu, J. T. Muckerman, Y. Zhu and R. R. Adzic, *Energy Environ. Sci.*, 2013, 6, 943-951.
4. C. Ge, P. Jiang, W. Cui, Z. Pu, Z. Xing, A. M. Asiri, A. Y. Obaid, X. Sun and J. Tian, *Electrochim. Acta*, 2014, 134, 182-186.
5. W. Chen, S. Iyer, S. Iyer, K. Sasaki, C. Wang, Y. Zhu, Muckerman, J. T and E. Fujita, *Energy Environ. Sci.*, 2013, 6, 1818-1826.
6. H. Ang, H. Wang, B. Li, Y. Zong, X. Wang and Q. Yan, *Small*, 2016, 12, 2859-2865.
7. H. Wu, B. Xia, L. Yu, X. Yu and X. Lou, *Nature Commun.*, 2015, 6, 6512.
8. P. Xiao, X. Ge, H. Wang, Z. Liu, A. Fisher and X. Wang, *Adv. Funct. Mater.*, 2015, 25, 1520-1526.
9. M. A. Lukowski, A. S. Daniel, F. Meng, A. Forticaux, L. Li and S. Jin, *J. Am. Chem. Soc.*, 2013, 135, 10274-10277.
10. J. Xie, J. Zhang, S. Li, F. Grote, X. Zhang, H. Zhang, R. Wang, Y. Lei, B. Pan and Y. Xie, *J. Am. Chem. Soc.*, 2013, 135, 17881-17888.
